# Supplementary material for: From Raffinose Family Oligosaccharides to Sucrose and Hexoses: Gene Expression Profiles Underlying Host-to-Nematode Carbon Delivery in Cucumis sativus Roots
Source: PubMed Central journal article supplement (PMC8892300; doi:10.3389/fpls.2022.823382), 2022-02-17
Supplement: Table_1.pdf [file Table_1.pdf]

**Supplemental Table 1 qRT-PCR primers used in this study**

| <b>genes</b>   | <b>sequence of primers (5'-3')</b>                     | <b>genes</b>                    | <b>sequence of primers (5'-3')</b>                 |
|----------------|--------------------------------------------------------|---------------------------------|----------------------------------------------------|
| <b>CsSPS1</b>  | ACACGTTTGCCAAGAATCAGTT<br>CAAGCCTTCTGAATTAGTTGGAGTC    | <b>CsAGA2</b>                   | GAAGATTACTGTCAACGATGGC<br>AAACAACAAAGGAAGCGAGTAC   |
| <b>CsSPS2</b>  | GTGCCACCGCCATTGAAGAACAGAA<br>GAGCTCCGTTACGAGTGTTGCG    | <b>CsAGA3</b>                   | GTTTATGTCAGTGATGCACCAG<br>GAGAATAAACAGTCCCCTGTTG   |
| <b>CsSPS4</b>  | AAGCAAAAAACAAGGAGGAAAAGCAC<br>CAACTTCCCTTTCTTTTGTGTCTT | <b>CsAGA4</b>                   | AAACATGAAACAGCTGAGTTCC<br>GAAATCATGATTCCCAGGCTTG   |
| <b>CsGolS1</b> | AGATGAATCTTTGGATTACCAAAAATG<br>TTGACAACCTCAGCCTCGGAC   | <b>CsaGA1</b>                   | TGGTGGTGTTTGTTTTAGCG<br>CCAGAGCATCAGCGGTTT         |
| <b>CsGolS2</b> | AGTGATCCTTCTTTGGACTACAAGCC<br>GTGACGAAGTGAACAGGTCCAGC  | <b>CsaGA3</b>                   | ATGCTGGTCTTTTCACTTGTC<br>GGTGGGTATCGCTTTATTGGT     |
| <b>CsGolS3</b> | GACGAAACCTTGGACTACATCAACTAT<br>GGCAGTGTGGCCGTAATGAAC   | <b>CsaGA4</b>                   | GTTCTGGGGCATACTG<br>CAGTGTATGCCCCAGGAAC            |
| <b>CsGolS4</b> | TCGCTCGATTTGAAGGAAGTGG<br>GAACATAGGCAATATTGGGCTCAG     | <b>CsaGA2</b>                   | ATGGTCTCGCTCTAACTCCTC<br>GATACCTTTCTTTGGGCTTG      |
| <b>CsRS</b>    | TTCGTTTTATGAGTATTTTCAGTTTA<br>GACAAAGTCACTATCCCCAGG    | <b>CsSUS1</b>                   | TCGTCTCTGTCATCGGTTA<br>CGAATAGGGTGTACTGGGCAGCAACTT |
| <b>CsSTS</b>   | CAACTGTCAAGGAGCAGGGTGGG<br>AGCGGTTTCGATTTTGGGGT        | <b>CsSUS2</b>                   | AGAAGATCCCGTAACCAAATGAAGA<br>AAAACATGGCTTCTTTCACG  |
| <b>CsSUT1</b>  | CGTGGTTACAAAGGTTGCTGAG<br>GAGAGGGGTAAACAGTGAATC        | <b>CsSUS3</b>                   | AGAGACCGAGAAAAGGCTAACT<br>AACTAACTCCCTAAGACGATCG   |
| <b>CsSUT2</b>  | TTCTAACTCCCTATATTCAGACGCTC<br>GCAATGCTCCTTTGTATCTCCTAA | <b>CsSUS4</b>                   | CATTTTTCTTGTCATTTACTGCTG<br>GCCCCGACACGAAACGAC     |
| <b>CsSUT4</b>  | GTCCTCCCTGGTTGTAGAAGAAAG<br>CTCTACCCATCCAATCAGTATCAAAG | <b>CsCWIN1</b>                  | CCAACCGAACCTTATGAA<br>CAGCCAAGCAGTAGTAGGG          |
| <b>CsHT1</b>   | CATCATGCAACCAAGATACAGG<br>AGACATAAGTGAAGCACTGTCA       | <b>CsCWIN2</b>                  | AGATTTCTTCCCTGTGGC<br>ATAAACGTCGTGCTTGGT           |
| <b>CsHT3</b>   | CTTCCCCGCTTCAATCTTAAC<br>GATGGATTTAGCAATCTCGCTG        | <b>CsCWIN3</b>                  | CTGTCATCGGCAGCAAGA<br>TAGCGGCAGAATGTAAAG           |
| <b>CsHT4</b>   | CGGCGGCGTCTTTGTATTC<br>GCCTTTTGATAGCTCCTTTCCTTG        | <b>CsCWIN4</b>                  | GTCCTGGGTTTGACTTTA<br>TCCAGACCATCCCTTATT           |
| <b>CsAGA1</b>  | GTCTTCATCCTATGGCCGAATA<br>ATAGAACCATCATGGAGCACAA       | <b>CsCWIN5</b>                  | CCGTCGCAGGCAGATGTT<br>CTGCTTTGGTCGCTACAC           |
| <b>CsSUBQ</b>  | CACCAAGCCCAAGAAGATC<br>TAAACCTAATCACCACCAGC            | <b>CsEF1<math>\alpha</math></b> | ACTGTGCTGTCTCATTATTG<br>AGGGTGAAAGCAAGAAGAGC       |
