# Supplementary material for: From Raffinose Family Oligosaccharides to Sucrose and Hexoses: Gene Expression Profiles Underlying Host-to-Nematode Carbon Delivery in Cucumis sativus Roots
Source: PubMed Central journal article supplement (PMC8892300; doi:10.3389/fpls.2022.823382), 2022-02-17
Supplement: Table_2.pdf [file Table_2.pdf]

**Supplemental Table 2 Gene accession in this study**

| <b>Gene</b>    | <b>Accession</b> | <b>Gene</b>                      | <b>Accession</b> |
|----------------|------------------|----------------------------------|------------------|
| <i>CsSPS1</i>  | CsaV3_1G027950.1 | <i>CsAGA2</i>                    | CsaV3_4G011820.1 |
| <i>CsSPS2</i>  | CsaV3_2G011150.1 | <i>CsAGA3</i>                    | CsaV3_1G026710.1 |
| <i>CsSPS4</i>  | CsaV3_2G033300.1 | <i>CsAGA4</i>                    | CsaV3_1G000950.1 |
| <i>CsGolS1</i> | CsaV3_6G000050.1 | <i>CsaGA1</i>                    | CsaV3_5G029180.1 |
| <i>CsGolS2</i> | CsaV3_3G031720.1 | <i>CsaGA3</i>                    | CsaV3_5G010860.1 |
| <i>CsGolS3</i> | CsaV3_1G015730.1 | <i>CsaGA4</i>                    | CsaV3_2G025010.1 |
| <i>CsGolS4</i> | CsaV3_5G031520.1 | <i>CsaGA2</i>                    | CsaV3_5G029190.1 |
| <i>CsRS</i>    | CsaV3_3G042690.1 | <i>CsSUS1</i>                    | CsaV3_4G000970.1 |
| <i>CsSTS</i>   | CsaV3_7G030090.1 | <i>CsSUS2</i>                    | CsaV3_1G005170.1 |
| <i>CsSUT1</i>  | CsaV3_2G010720.1 | <i>CsSUS3</i>                    | CsaV3_1G041400.1 |
| <i>CsSUT2</i>  | CsaV3_5G025170.1 | <i>CsSUS4</i>                    | CsaV3_5G020420.1 |
| <i>CsSUT4</i>  | CsaV3_2G030550.1 | <i>CsCWIN1</i>                   | CsaV3_4G035700.1 |
| <i>CsHT1</i>   | CsaV3_2G010410.1 | <i>CsCWIN2</i>                   | CsaV3_7G034730.1 |
| <i>CsHT3</i>   | CsaV3_4G004110.1 | <i>CsCWIN3</i>                   | CsaV3_3G037440.1 |
| <i>CsHT4</i>   | CsaV3_2G002050.1 | <i>CsCWIN4</i>                   | CsaV3_2G025540.1 |
| <i>CsAGA1</i>  | CsaV3_4G033560.1 | <i>CsCWIN5</i>                   | CsaV3_7G034730.1 |
| <i>CsUBQ</i>   | CsaV3_2G010720.1 | <i>CsEF1-<math>\alpha</math></i> | CsaV3_2G011610.1 |
